# Supplementary material
Source: publisher figshare collection journal article supplement (https://karger.figshare.com/ndownloader/files/28959567)
Supplement: Supplementary file 1 [file 28959567]

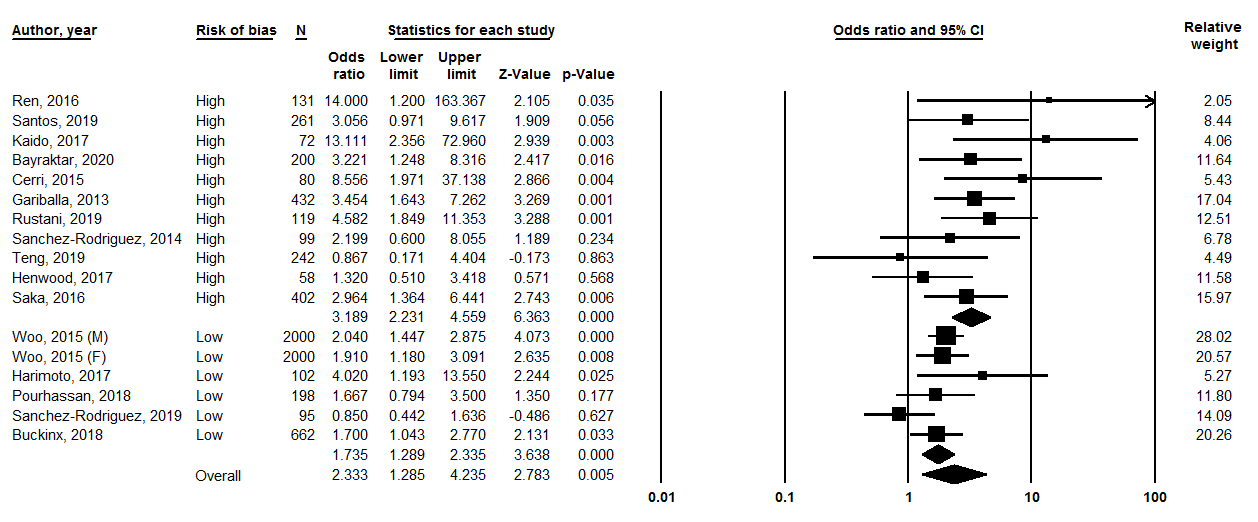
**Supplementary Figure 9.** Meta-analysis of the association between sarcopenia and mortality presented in odds ratios, stratified by high and low risk of bias.

Heterogeneity (I2): high risk of bias (20.1%), low risk of bias (32.2%). M: males, F: females
